# Supplementary material
Source: publisher figshare collection journal article supplement (https://gsajournals.figshare.com/ndownloader/files/12749891)
Supplement: Supplementary file 1 [file 12749891]

**Table S1**. Primer sequences used in the current study.

| **Primer/sequence name** | **Sequence** |
| --- | --- |
| Dot6-deletion-F1 | atgagttcacaagagatagaggcaagtggttcttctgaatcaaaatccggatcttccagtcaaaaaaacccttcccgtacgaagcttcgtacgctgcaggtc |
| Dot6-deletion-R1 | ttgaacctctgactgataaaggattaacggctgaactcattcttctttttttctttcttggatgtggaatatcatcaacgtcaactaatacttctgatatcatcgatgaattcgag |
| Dot6-Revertant-F1 | cccaagcttATGAGTTCACAAGAGATAGAGGCA |
| Dot6-Revertant-R1 | CTAGCTAGCCTACTTTCTAATTGAACCTCTGACTGA |
| Hog1-deletion-F1 | atagaaagaaaatttttacaaagataaagcatataagaaaatgtctgcagatggagaatttacaagaacccagatatttgggactggaagcttcgtacgctgcaggtc |
| Hog1-deletion-R1 | Taagctccgttggcggaatccaagttgttttgctccacttgcaggtctggttgttcggaaccctcagtttcatttgccacaccatctgatatcatcgatgaattcgag |
| Swi4-deletion-F1 | Atgtctgaacctccccaagtatttcgagctacctactcaaatgtatgttataccaatgtttcttaacttctttttatgaagaagcttcgtacgctgcaggtc |
| Swi4-deletion-R1 | tcacgtcataccttcagttaatgattcggcaattccatcaattaaactgtcaatttcttcaactttaacaccacaactcatctgatatcatcgatgaattcgag |
| Sfp1-deletion-F1 | atgtttaataccaagatatttgaaaatacaggctcatcagggtcgacaactgcaatgaatattcctgttcaatcagaaccgaagcttcgtacgctgcaggtc |
| Sfp1-deletion-R1 | ttaatgagtggtatgcccacgatggtatttcaatccattgagattcttatatctcttaccacatacctcacatctatattctgatatcatcgatgaattcgag |
| Dot6-GFP-F1 | ATATTCCACATCCAAGAAAGAAAAAAAGAAGAATGAGTTCAGCCGTTAATCCTTTATCAGTCAGAGGTTCAATTAGAAAGGGTGCTGGCGCAGGTCGTTC |
| Dot6-GFP-R1 | GAATTGTGTAAATAGAAAAAAACAAAAAACAAAAATAGAATTAAACTTGGTTTCATTTCAGGTTTCAATGTCAATTGAAATCTGATATCATCGATGAATTCGAG |
| Dot6-sgRNA-Top | ATTTGttggagaacttgagaaatggt |
| Dot6-sgRNA-Bottom | AAACaccatttctcaagttctccaa |
| Dot6-STOP-Top-F1 | caaagaacggaaggagaaatatggacccgtatagattatttggagaacttgagaaatggt |
| Dot6-STOP-bottom-R1 | ctcttgtcgtgctcgtctcaggtctcttgagtttgctgatctatgtccacTTAttctcaagttctccaa |
| qAct1 F1 | GAAGCCCAATCCAAAAGA |
| qAct1 R1 | CTTCTGGAGCAACTCTCAATTC |
| qDBP7F1 | CGGGACTCTGAAGATAAGGT |
| qDBP7R1 | GGCGCTAAATGAGATGTTGG |
| qKRE33F1 | ACCTATTTCAGGGGGCAAAC |
| qKRE33R1 | TGGACAAGGCCACTAATGAC |
